# Supplementary material for: Multiple Insecticide Resistance and Associated Metabolic-Based Mechanisms in a Myzus Persicae (Sulzer) Population
Source: MDPI journal article supplement (doi:10.3390/agronomy13092276), 2023-08-29
Supplement: s1 [file s1]

Table S1 Primers used for qPCR in the research.

| Genes          | Sequence (5' - 3')       |                          |
|----------------|--------------------------|--------------------------|
|                | Forward                  | Reverse                  |
| $\beta$ -ACTIN | CGGCGGTGGTGGTGAAGCTG     | CGGCGGTGGTGGTGAAGCTG     |
| CYP6CY3        | CGGGGTGACGATCATCTATT     | GGGTGGTCTTTTGACAAAGC     |
| CYP380C40      | GCCAGTGATACTCAGAGAACT    | AGCGACATTTTCTGGGCTGAA    |
| CYP6CY9        | GAAGCTACGCAGGATTACCA     | TCCATCACCAAACGGCATAT     |
| CYP6K1         | CAAGTATGGCGTCACTAATATC   | CATTACACCGTTTGGCTTT      |
| CYP6CY23       | CGATTACCCGACGATTCAT      | ACAAATGCGAGGTCCATC       |
| CYP6CY56       | CGAGACCAATCCGTTGTC       | TTATGGCGTTCAGCTTGAG      |
| CYP4G15        | GGTCCAAGAGGTTGTATAGG     | TGTGTTGGTCTTCTATCTCG     |
| CYP3CY06       | TACCTCGGTCAGTCAACA       | ATTCCTTCGTCGTCCAAA       |
| E4             | AAACTTTCCTTTTACACCGTT    | TCTAAGCCAAGAAATGTTGAAA   |
| THEM           | GATCGTGCTTCTGTACTG       | CGAGTTGTTCATGTGGAA       |
| GST            | ACCCATGAGATTCCTTCTGTCC   | TTCCAACACAGGCACTTTGC     |
| UGT344P2       | AATGGTTTCCTCAGCGTGAAG    | GGCTGATCATAGAACATGGG     |
| SOD            | GAAGAACCTCAAGCCTATCAGCG  | CAGAGGGTGCTTTACAAGGATCT  |
| POD            | GCCGTTGAGATTACTGGTGGAC   | GTCTTCCTGATGCTACCAAGGG   |
| CAT            | GAGGAAGCTATCAGAGTTGGAGGA | GCTCCTAGAGCTGTATTCCCAAGT |
